# Supplementary material for: Computational Mechanics of Form-Fitting 3D-Printed Lattice-Based Wrist-Hand Orthosis for Motor Neuron Disease
Source: MDPI journal article supplement (doi:10.3390/biomedicines11071787), 2023-06-22
Supplement: s1 [file s1]

Supplementary Information

# Computational Mechanics of Form-Fitting 3D-Printed Lattice-Based Hand-Wrist Orthosis for Motor Neuron Diseases

Silvia Badini <sup>1,†</sup>, Stefano Regondi <sup>1,2</sup>, Carmen Lammi <sup>3</sup>, Carlotta Bollati <sup>3</sup>, Giordana Donvito <sup>1</sup>  
and Raffaele Pugliese <sup>1,\*</sup>,<sup>†</sup>

<sup>1</sup> Nemolab, ASST GOM Niguarda Cà Granda Hospital, Milan, 20162 Italy; silvia.badini@nemolab.it (S.B.); stefano.regondi@nemolab.it (S.R.); giordana.donvito@nemolab.it (G.D.)

<sup>2</sup> NEuroMuscular Omnicenter (NEMO), Milan 20162, Italy

<sup>3</sup> Department of Pharmaceutical Sciences, University of Milan, Milan, 20133 Italy; carmen.lammi@unimi.it (C.L.); carlotta.bollati@unimib.it (C.B.)

\* Correspondence: raffaele.pugliese@nemolab.it

† These authors contributed equally to this work.

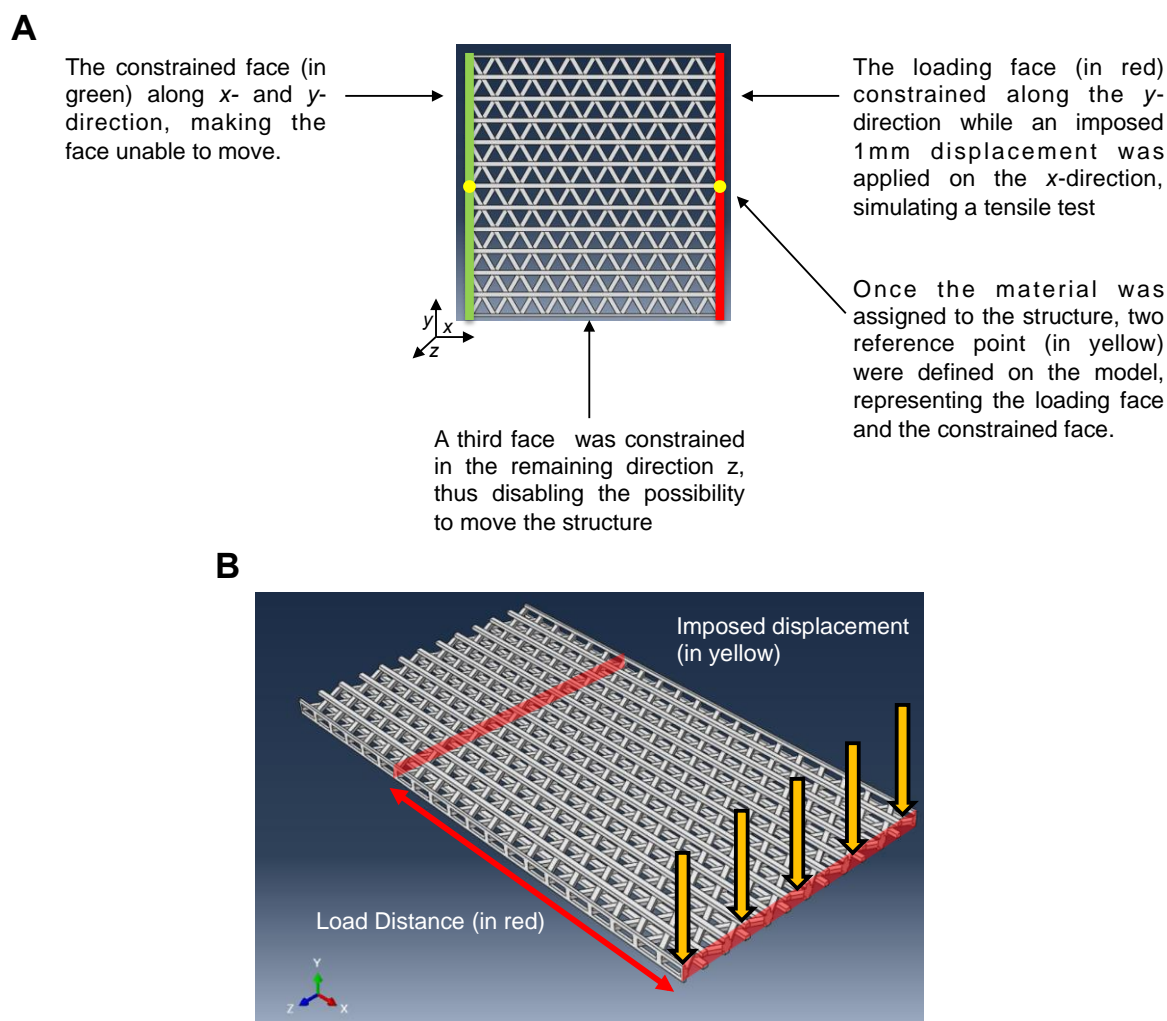

**Figure S1.** Details of FEM procedures for tensile and three point bending simulations. (A) Tensile test, and (B) three-point-bending simulation.

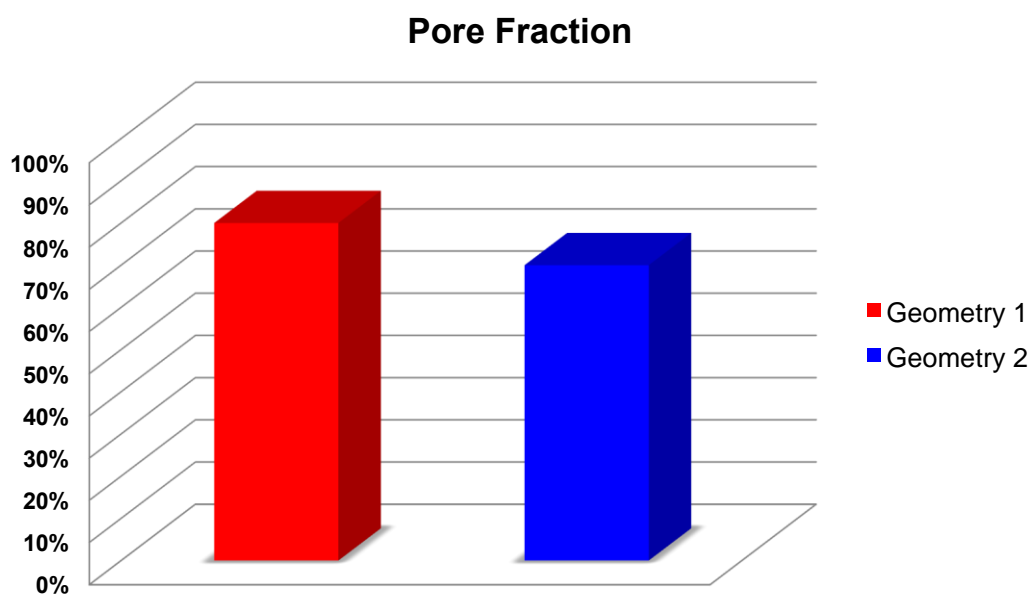

**Figure S2.** Designed porosity calculation obtained with Equation (1).
